# Supplementary material for: Effect of different recovery modes during resistance training with blood flow restriction on hormonal levels and performance in young men: a randomized controlled trial
Source: PubMed Central journal article supplement (PMC8957130; doi:10.1186/s13102-022-00442-0), 2022-03-25
Supplement: 13102_2022_442_MOESM1_ESM.pdf [file 13102_2022_442_MOESM1_ESM.pdf]

| group | CRP1 | CRP2 | TESTESTRC | TESTESTRO | WEIGHT1 | WEIGHT2 | BMI1 | BMI2  |
|-------|------|------|-----------|-----------|---------|---------|------|-------|
| PR    | 2.4  | 3.3  | 6.17      | 7.5       | 73      | 73      | 23.3 | 23.3  |
|       | 3.3  | 0.9  | 4.36      | 5.01      | 62      | 68      | 20.2 | 22.2  |
|       | 2.9  | 1.9  | 4.51      | 3.74      | 81      | 80      | 25   | 24.6  |
|       | 2.8  | 1.2  | 2.98      | 4.56      | 70      | 71.5    | 20.6 | 21.1  |
|       | 2.5  | 2.2  | 5.66      | 6.33      | 65      | 65      | 21.7 | 21.7  |
|       | 3.3  | 1.4  | 7.6       | 4.78      | 76      | 77      | 22.6 | 22.9  |
|       | 3.1  | 0.6  | 5.84      | 5.76      | 68      | 69      | 22.4 | 22.7  |
|       | 2.6  | 1.7  | 3.46      | 5.59      | 65      | 65      | 21.4 | 21.4  |
|       | 2.9  | 1.7  | 5.07      | 5.41      | 70      | 71      | 22.2 | 22.5  |
|       | 2.9  | 1.7  | 5.07      | 5.41      | 70      | 71      | 22.2 | 22.5  |
| AR    | 2.1  | 1.3  | 4.66      | 5.64      | 67      | 68      | 20   | 20.3  |
|       | 2.2  | 2.5  | 6.51      | 9.09      | 72      | 72      | 22.4 | 22.4  |
|       | 2.9  | 0.2  | 5.26      | 5.3       | 66      | 67      | 20.3 | 20.6  |
|       | 3.4  | 3    | 8.89      | 6.96      | 66      | 67      | 20.3 | 20.6  |
|       | 2.4  | 0.5  | 7.21      | 5.91      | 88      | 87      | 23.6 | 23.3  |
|       | 3.2  | 1.6  | 4.78      | 6.84      | 71      | 72      | 22.6 | 22.9  |
|       | 2.9  | 2.4  | 5.63      | 5.7       | 76      | 77.5    | 23.1 | 23.7  |
|       | 2.6  | 1.8  | 6.36      | 4.78      | 76      | 76      | 22.6 | 22.6  |
|       | 2.7  | 1.66 | 6.16      | 6.27      | 72      | 73      | 21.8 | 22.05 |
|       | 2.7  | 1.66 | 6.16      | 6.27      | 72      | 73      | 21.8 | 22.05 |

| group | CORTISOL1 | CORTISOL2 | SARJENT1 | SARJENT2 | LACTATE1 | LACTATE2 |
|-------|-----------|-----------|----------|----------|----------|----------|
|       | 8.72      | 7.41      | 43       | 49       | 12       | 14       |
|       | 14.24     | 10.97     | 51       | 61       | 16       | 13       |
| PR    | 10.11     | 8.79      | 44       | 48       | 16       | 11       |
|       | 8.34      | 5.39      | 51       | 55       | 13       | 12       |
|       | 7.8       | 8.07      | 50       | 53       | 11       | 10       |
|       | 6.39      | 9.41      | 52       | 57       | 9        | 12       |
|       | 8.21      | 7.14      | 43       | 47       | 12       | 10       |
|       | 7.94      | 4.49      | 55       | 56       | 17       | 15       |
|       | 8.96      | 7.71      | 48       | 53       | 13       | 12       |
|       | 8.96      | 7.71      | 48       | 53       | 13       | 12       |
| AR    | 15.25     | 11.95     | 56       | 63       | 14       | 14       |
|       | 6.69      | 5.8       | 45       | 52       | 15       | 14       |
|       | 7.48      | 5.84      | 54       | 60       | 13       | 16       |
|       | 5.5       | 7.46      | 59       | 62       | 12       | 10       |
|       | 3.14      | 6.89      | 55       | 57       | 10       | 10       |
|       | 7.66      | 5.42      | 47       | 51       | 14       | 11       |
|       | 7.45      | 6.37      | 50       | 54       | 19       | 13       |
|       | 8.65      | 10.03     | 52       | 57       | 13       | 11       |
|       | 7.72      | 7.47      | 52       | 57       | 13       | 12.38    |
|       | 7.72      | 7.47      | 52       | 57       | 13       | 12.38    |

| group | GH1  | GH2  | drop power | drop power | Peak Powe | Peak Powe | Minimum I | Minimum I |
|-------|------|------|------------|------------|-----------|-----------|-----------|-----------|
| PR    | 0.1  | 0.3  | 55.41      | 46.88      | 632.66    | 676.97    | 282.06    | 359.58    |
|       | 0.1  | 0.5  | 58.5       | 67.94      | 484.26    | 655.24    | 200.96    | 210.1     |
|       | 0.1  | 0.15 | 64.51      | 59.59      | 644.23    | 744.16    | 228.6     | 300.67    |
|       | 0.2  | 0.7  | 58.51      | 60.87      | 602.36    | 717.84    | 249.87    | 280.88    |
|       | 0.15 | 0.6  | 55.01      | 59.37      | 562.67    | 650.78    | 253.13    | 264.39    |
|       | 0.73 | 1.1  | 39.05      | 46.48      | 539.24    | 693.16    | 328.62    | 370.94    |
|       | 0.05 | 0.07 | 56.22      | 39.14      | 489.67    | 514.91    | 214.35    | 313.35    |
|       | 0.5  | 0.55 | 58.32      | 59.49      | 609.16    | 693.83    | 253.84    | 281.05    |
|       | 0.24 | 0.49 | 55.69      | 54.97      | 570.53    | 668.36    | 251.43    | 297.62    |
|       | 0.24 | 0.49 | 55.69      | 54.97      | 570.53    | 668.36    | 251.43    | 297.62    |
| AR    | 0.3  | 1.9  | 63.2       | 70.06      | 632.45    | 734.03    | 232.68    | 219.76    |
|       | 0.1  | 0.3  | 60.89      | 58.16      | 669.96    | 710.98    | 261.96    | 297.44    |
|       | 0.07 | 1.15 | 50.71      | 53.52      | 622.76    | 791.45    | 306.95    | 367.82    |
|       | 0.36 | 0.9  | 57.35      | 55.18      | 536.29    | 605.65    | 228.72    | 271.44    |
|       | 0.55 | 1.25 | 53.12      | 66.92      | 642.38    | 753.74    | 301.11    | 249.33    |
|       | 0.05 | 0.25 | 62.23      | 64.82      | 545.51    | 632.47    | 206.03    | 222.49    |
|       | 0.25 | 0.7  | 57.23      | 59.76      | 439.14    | 629.64    | 187.78    | 253.39    |
|       | 0.1  | 0.6  | 56.42      | 61.46      | 680.68    | 819.35    | 296.64    | 315.79    |
|       | 0.22 | 0.88 | 57.64      | 61.23      | 596.14    | 709.66    | 252.73    | 274.68    |
|       | 0.22 | 0.88 | 57.64      | 61.23      | 596.14    | 709.66    | 252.73    | 274.68    |

Power 2

| group | Mean Pow | MeanPowe | LDH1 | LDH2 |
|-------|----------|----------|------|------|
|       | 454.89   | 501.7    | 357  | 309  |
|       | 382.92   | 456.79   | 296  | 267  |
| PR    | 487.35   | 522.41   | 271  | 249  |
|       | 426.56   | 499.36   | 260  | 258  |
|       | 416.06   | 457.58   | 235  | 233  |
|       | 443.85   | 532.05   | 393  | 353  |
|       | 352.02   | 418.12   | 292  | 282  |
|       | 432      | 458.79   | 305  | 275  |
|       | 424.45   | 480.85   | 301  | 278  |
|       | 424.45   | 480.85   | 201  | 278  |
| AR    | 462.95   | 463.34   | 264  | 263  |
|       | 483.89   | 520.48   | 309  | 286  |
|       | 481.16   | 579.63   | 328  | 276  |
|       | 405.18   | 438.54   | 260  | 217  |
|       | 471.73   | 524.05   | 287  | 234  |
|       | 374.6    | 427.48   | 314  | 283  |
|       | 313.23   | 448.39   | 274  | 245  |
|       | 487.5    | 535.46   | 249  | 225  |
|       | 435.03   | 492.17   | 285  | 253  |
|       | 435.03   | 492.17   | 285  | 253  |
